# Supplementary material
Source: PubMed Central journal article supplement (PMC9836743)

**SUPPLEMENTARY CONTENT**

| <b>Supplementary Table 1. Cardiac diagnoses by modified World Health Organization classification, frequency in Nationwide Readmissions Database, expected adverse cardiac event rate, and corresponding International Disease Classification, Tenth Revision, Clinical Modification codes.</b> |                                                               |                                         |                                             |
|------------------------------------------------------------------------------------------------------------------------------------------------------------------------------------------------------------------------------------------------------------------------------------------------|---------------------------------------------------------------|-----------------------------------------|---------------------------------------------|
| <b>Diagnosis</b>                                                                                                                                                                                                                                                                               | <b>ICD-10-CM code</b>                                         | <b>Frequency of diagnosis<br/>N (%)</b> | <b>Expected maternal cardiac event rate</b> |
| <i>Modified WHO classification I</i>                                                                                                                                                                                                                                                           |                                                               |                                         |                                             |
| Uncomplicated or mild pulmonary stenosis                                                                                                                                                                                                                                                       | Q221, I37.0, I09.89                                           | 615 (0.0)                               | 2-5%                                        |
| Uncomplicated or small patent ductus arteriosus                                                                                                                                                                                                                                                | Q25.0                                                         | 289 (0.0)                               |                                             |
| Uncomplicated or mild mitral valve prolapse                                                                                                                                                                                                                                                    | I34.1                                                         | 11,961 (0.1)                            |                                             |
| Successfully repaired ASD                                                                                                                                                                                                                                                                      | Q21.1, Q21.2, Q20.8, Q21.8, Q21.9                             | 4,456 (0.0)                             |                                             |
| Successfully repaired VSD                                                                                                                                                                                                                                                                      | Q21.0                                                         | 2,465 (0.0)                             |                                             |
| Successfully repaired PDA                                                                                                                                                                                                                                                                      | Q25.0                                                         | 289 (0.0)                               |                                             |
| Successfully repaired anomalous pulmonary venous return                                                                                                                                                                                                                                        | Q26.2 or Q26.3                                                | 56 (0.0)                                |                                             |
| Atrial ectopic beats                                                                                                                                                                                                                                                                           | I49.1, I49.49                                                 | 1,363 (0.0)                             |                                             |
| Ventricular ectopic beats                                                                                                                                                                                                                                                                      | I49.3                                                         | 6,126 (0.0)                             |                                             |
| <i>Modified WHO classification II</i>                                                                                                                                                                                                                                                          |                                                               |                                         |                                             |
| Unoperated ASD                                                                                                                                                                                                                                                                                 | *Same as above for repaired ASD                               | --                                      | 6-10%                                       |
| Unoperated VSD                                                                                                                                                                                                                                                                                 | *Same as above for repaired VSD                               | --                                      |                                             |
| Repaired Tetralogy of Fallot                                                                                                                                                                                                                                                                   | Q21.3                                                         | 330 (0.0)                               |                                             |
| Repaired aortic coarctation                                                                                                                                                                                                                                                                    | Q25.1                                                         | 515 (0.0)                               |                                             |
| Supraventricular arrhythmias                                                                                                                                                                                                                                                                   | I47.1, I48.91, I48.20, Z86.79, I48.92, I45.6                  | 30,830 (0.2)                            |                                             |
| Turner syndrome without congenital cardiac disease                                                                                                                                                                                                                                             | Q96.x                                                         | 1,004 (0.0)                             |                                             |
| <i>Modified WHO classification II-III</i>                                                                                                                                                                                                                                                      |                                                               |                                         |                                             |
| Mild left ventricular impairment (EF >45%)                                                                                                                                                                                                                                                     | †                                                             | --                                      | 11-19%                                      |
| Hypertrophic cardiomyopathy                                                                                                                                                                                                                                                                    | I42.1, I42.2                                                  | 635 (0.0)                               |                                             |
| Mild mitral stenosis                                                                                                                                                                                                                                                                           | I05.0, I34.2                                                  | 314 (0.0)                               |                                             |
| Moderate aortic stenosis                                                                                                                                                                                                                                                                       | I06.0, I06.2, I35.0, I35.2, Q25.3, Q24.3, Q25.2, Q23.0, Q24.4 | 1,383 (0.0)                             |                                             |
| Marfan or other HTAD syndrome without aortic dilation                                                                                                                                                                                                                                          | Q87.40, Q79.60, Q79.61, Q79.63,                               | 1,064 (0.0)                             |                                             |

|                                                                                                                                                                                   |                                                                                               |             |        |
|-----------------------------------------------------------------------------------------------------------------------------------------------------------------------------------|-----------------------------------------------------------------------------------------------|-------------|--------|
| Aorta < 45 mm in bicuspid aortic valve pathology                                                                                                                                  | Q23.1                                                                                         | 3,171 (0.0) |        |
| Repaired coarctation without residua (non-Turner)                                                                                                                                 | Excluded (see above in class II)                                                              | --          |        |
| <i>Modified WHO classification III</i>                                                                                                                                            |                                                                                               |             |        |
| Previous peripartum cardiomyopathy with no residual left ventricular dysfunction                                                                                                  | †                                                                                             | --          | 20-27% |
| Moderate left ventricular impairment (EF 30–45%)                                                                                                                                  | I50.1, I50.2x, I50.3x, I50.4x, I50.9, I11.0                                                   | 6,615 (0.0) |        |
| Mechanical valve                                                                                                                                                                  | Z95.2                                                                                         | 1,746 (0.0) |        |
| Systemic right ventricle with good or mildly decreased ventricular function                                                                                                       | Q23.4, Q20.5                                                                                  | 243 (0.0)   |        |
| Uncomplicated Fontan circulation                                                                                                                                                  | Q20.8                                                                                         | 45 (0.0)    |        |
| Unrepaired cyanotic heart disease                                                                                                                                                 | Q20.0, Q20.8, Q20.3, Q22.9, Q26.2                                                             | 173 (0.0)   |        |
| Moderate mitral stenosis                                                                                                                                                          | Same as above for mild mitral stenosis                                                        | --          |        |
| Severe asymptomatic aortic stenosis                                                                                                                                               | Same as above for moderate aortic stenosis                                                    | --          |        |
| Moderate aortic dilation (40–45 mm in Marfan syndrome or other HTAD; 45–50 mm in bicuspid aortic valve; Turner syndrome ASI 20–25 mm/m <sup>2</sup> ; Tetralogy of Fallot <50 mm) | Excluded as aortic aneurysm was included as part of composite outcome                         | --          |        |
| Ventricular tachycardia                                                                                                                                                           | I47.2                                                                                         | 1,717 (0.0) |        |
| <i>Modified WHO classification IV</i>                                                                                                                                             |                                                                                               |             |        |
| Pulmonary arterial hypertension                                                                                                                                                   | I27.2, I27.21                                                                                 | 3,447 (0.0) | >27%   |
| Severe systemic ventricular dysfunction (EF 30%, NYHA III-IV)                                                                                                                     | Same as above for moderate left ventricular impairment                                        | --          |        |
| Previous peripartum cardiomyopathy with any residual left ventricular dysfunction                                                                                                 | I42.0, O90.3                                                                                  | 3,880 (0.0) |        |
| Severe mitral stenosis                                                                                                                                                            | Same as above for mild mitral stenosis                                                        | --          |        |
| Severe symptomatic aortic stenosis                                                                                                                                                | Same as above for moderate aortic stenosis                                                    | --          |        |
| Systemic right ventricle with moderate to severely decreased ventricular function                                                                                                 | Same as above for systemic right ventricle with good or mildly decreased ventricular function | --          |        |

|                                                                                                                                                            |                                                                       |           |  |
|------------------------------------------------------------------------------------------------------------------------------------------------------------|-----------------------------------------------------------------------|-----------|--|
| Severe aortic dilation (45 mm in Marfan syndrome or other HTAD; 50 mm in bicuspid aortic valve; Turner syndrome ASI .25 mm/m2 ; Tetralogy of Fallot 50 mm) | Excluded as aortic aneurysm was included as part of composite outcome | --        |  |
| Vascular Ehlers-Danlos                                                                                                                                     | Q79.63 (only added in late 2019)                                      | <10 (0.0) |  |
| Severe (re)coarctation                                                                                                                                     | Excluded (see above in class II)                                      |           |  |
| Fontan circulation with any complication                                                                                                                   | Same as above for uncomplicated Fontan circulation                    |           |  |

†Specific ICD-10 code not available.

Supplementary Table 2: Components of Composite Outcomes

|                                                  | WHO Cardiac Category                                     |                                                                      |                                                    |                                                         | p      |
|--------------------------------------------------|----------------------------------------------------------|----------------------------------------------------------------------|----------------------------------------------------|---------------------------------------------------------|--------|
|                                                  | Overall<br>(N=8,004,184)<br>(Weighted N<br>= 14,995,122) | No heart<br>disease<br>(N=7,959,609)<br>(Weighted N<br>= 14,911,251) | WHO I-II<br>(N=24,947)<br>(Weighted N<br>= 46,541) | WHO II/III-IV<br>(N=19,628)<br>(Weighted N<br>= 37,330) |        |
|                                                  |                                                          | Mean (Standard Deviation) or %                                       |                                                    |                                                         |        |
| Acute myocardial infarction                      | 445 (0.0)                                                | 263 (0.0)                                                            | 27 (0.1)                                           | 155 (0.4)                                               | <0.001 |
| Aneurysm                                         | 420 (0.0)                                                | 35 (0.0)                                                             | 0 (0.0)                                            | 385 (1.0)                                               | <0.001 |
| Acute renal failure                              | 17,403 (0.1)                                             | 16,080 (0.1)                                                         | 185 (0.4)                                          | 1,138 (3.0)                                             | <0.001 |
| Adult respiratory distress syndrome              | 11,593 (0.1)                                             | 9,250 (0.1)                                                          | 196 (0.4)                                          | 2,147 (5.8)                                             | <0.001 |
| Amniotic fluid embolism                          | 731 (0.0)                                                | 622 (0.0)                                                            | 28 (0.1)                                           | 82 (0.2)                                                | <0.001 |
| Cardiac arrest/ventricular fibrillation          | 1,245 (0.0)                                              | 933 (0.0)                                                            | 45 (0.1)                                           | 267 (0.7)                                               | <0.001 |
| Conversion of cardiac rhythm                     | 1,080 (0.0)                                              | 641 (0.0)                                                            | 185 (0.4)                                          | 254 (0.7)                                               | <0.001 |
| Disseminated intravascular coagulation           | 25,473 (0.2)                                             | 24,789 (0.2)                                                         | 210 (0.5)                                          | 474 (1.3)                                               | <0.001 |
| Eclampsia                                        | 12,315 (0.1)                                             | 11,995 (0.1)                                                         | 78 (0.2)                                           | 243 (0.7)                                               | <0.001 |
| Heart failure/arrest during surgery or procedure | 123 (0.0)                                                | 80 (0.0)                                                             | * (0.0)                                            | 40 (0.1)                                                | <0.001 |
| Puerperal cerebrovascular disorders              | 3,886 (0.0)                                              | 3,661 (0.0)                                                          | 70 (0.2)                                           | 155 (0.4)                                               | <0.001 |
| Pulmonary edema / Acute heart failure            | 9,362 (0.1)                                              | 3,412 (0.0)                                                          | 42 (0.1)                                           | 5,909 (15.8)                                            | <0.001 |
| Severe anesthesia complications                  | 902 (0.0)                                                | 799 (0.0)                                                            | 37 (0.1)                                           | 66 (0.2)                                                | <0.001 |
| Sepsis                                           | 13,796 (0.1)                                             | 12,979 (0.1)                                                         | 195 (0.4)                                          | 622 (1.7)                                               | <0.001 |
| Shock                                            | 9,593 (0.1)                                              | 8,667 (0.1)                                                          | 169 (0.4)                                          | 757 (2.0)                                               | <0.001 |
| Sickle cell disease with                         | 1,857 (0.0)                                              | 1,726 (0.0)                                                          | 34 (0.1)                                           | 96 (0.3)                                                | <0.001 |

|                             |               |               |           |             |        |
|-----------------------------|---------------|---------------|-----------|-------------|--------|
| crisis                      |               |               |           |             |        |
| Air and thrombotic embolism | 4,694 (0.0)   | 4,309 (0.0)   | 115 (0.2) | 270 (0.7)   | <0.001 |
| Blood products transfusion  | 164,049 (1.1) | 161,306 (1.1) | 985 (2.1) | 1,758 (4.7) | <0.001 |
| Hysterectomy                | 12,711 (0.1)  | 12,449 (0.1)  | 131 (0.3) | 132 (0.4)   | <0.001 |
| Temporary tracheostomy      | 193 (0.0)     | 150 (0.0)     | * (0.0)   | 37 (0.1)    | <0.001 |
| Ventilation                 | 7,025 (0.0)   | 5,809 (0.0)   | 146 (0.3) | 1,071 (2.9) | <0.001 |

---

P-values by weighted linear regression for continuous variables and weighted chi2 test for binary/categorical variables

\* Value  $\leq 10$  suppressed due to data use agreement limitations

Supplementary Table 3: Covariate-adjusted outcomes for events following delivery hospitalization, not including NRD weighting and stratification

|                                    | <b>Cardiac SMM<br/>during Delivery<br/>Hospitalization</b> | <b>No Cardiac SMM<br/>during Delivery<br/>Hospitalization</b> |
|------------------------------------|------------------------------------------------------------|---------------------------------------------------------------|
|                                    | Adjusted Hazard Ratio (95% Confidence Interval)*           |                                                               |
| <b>Any SMM or Death</b>            |                                                            |                                                               |
| mWHO I-II                          | 1.88 (1.11, 3.19)                                          | 1.53 (1.34, 1.74)                                             |
| mWHO II/III-IV                     | 1.75 (1.50, 2.05)                                          | 3.28 (2.96, 3.63)                                             |
| <b>Nontransfusion SMM or Death</b> |                                                            |                                                               |
| mWHO I-II                          | 1.54 (0.85, 2.77)                                          | 1.57 (1.38, 1.81)                                             |
| mWHO II/III-IV                     | 1.75 (1.49, 2.05)                                          | 3.33 (2.99, 3.70)                                             |
| <b>Cardiac SMM or Death</b>        |                                                            |                                                               |
| mWHO I-II                          | 1.95 (0.84, 4.51)                                          | 2.07 (1.64, 2.61)                                             |
| mWHO II/III-IV                     | 3.10 (2.52, 3.83)                                          | 7.15 (6.20, 8.25)                                             |
| <b>Death</b>                       |                                                            |                                                               |
| mWHO I-II                          | †                                                          | 0.68 (0.10, 4.53)                                             |
| mWHO II/III-IV                     | 2.36 (0.65, 8.55)                                          | 8.43 (4.77, 14.91)                                            |

\* All comparisons versus patients without cardiac disease. Adjusted for age, delivery type, comorbid conditions, calendar year/quarter, and patient age

†Unable to estimate due to low event rate

Supplementary Figure 1: Adjusted in-hospital outcomes, stratified by modified World Health Organization cardiac category, compared to no heart disease, not including NRD weighting and stratification

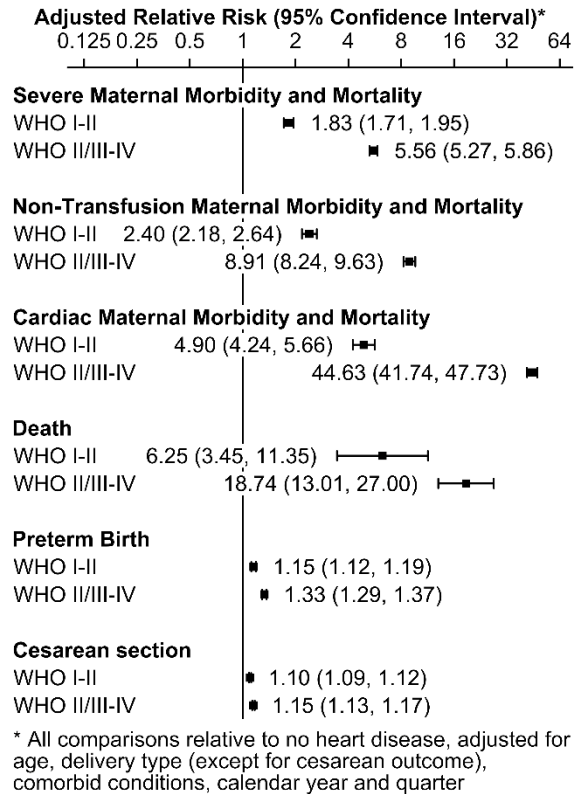

Supplement: NIHMS1862788-supplement-1.pdf [file NIHMS1862788-supplement-1.pdf]
